# Supplementary material for: Targeted Bottom–Up Mass Spectrometry Approach for the Relative Quantification of Post-Translational Modification of Bovine κ-Casein during Milk Fermentation
Source: MDPI journal article supplement (doi:10.3390/molecules27185834), 2022-09-08

## **Supplementary Data**

### **Targeted Bottom-Up Mass Spectrometry Approach for the Relative Quantification of Post Translational Modification of Bovine $\kappa$ -Casein during Milk Fermentation**

**Sorel Tchewonpi Sagu <sup>1,2</sup>, Harshadrai M. Rawel <sup>1</sup> and Sascha Rohn <sup>2,\*</sup>**

<sup>1</sup> Institute of Nutritional Science, University of Potsdam, Arthur-Scheunert-Allee 114-116, Nuthetal, 14558 Potsdam, Germany

<sup>2</sup> Institute of Food Technology and Food Chemistry, Technische Universität Berlin, Gustav-Meyer-Allee 25, 13355 Berlin, Germany

\* Correspondence: rohn@tu-berlin.de; Tel.: +49-30-314-72583

## **Content**

**Figure S1.** Linearity of the peptide (a) E.IPTINTIASGEPTSTPTTE.A [140, 158] and it modified forms (b) E.IPTINTIASGEPTSTPTTE.A [140, 158]; (c) E.IPTINTIASGEPTSTPTTE.A [140, 158] and (d) E.IPTINTIASGEPTSTPTTE.A [140, 158] using the developed LC-MS/MS method. Red and green colors represent glycosylated and phosphorylated amino acid residues, respectively.

**Figure S2.** Linearity of the peptide (a) E.INTVQVTSTAV and it modified form (b) E.INTVQVTSTAV using the developed LC-MS/MS method. Red and green colors represent glycosylated and phosphorylated amino acid residues, respectively.

**Figure S3.** Linearity of the peptide (a) E.STVATLE.D [162, 168] and it modified forms (b) E.STVATLE.D [162, 168] and (d) E.STVATLE.D [162, 168] using the developed LC-MS/MS method. Red and green colors represent glycosylated and phosphorylated amino acid residues, respectively.

**Figure S4.** Recovery of the injected internal standards DPLNV(d8)LKPR in the different milk and fermented milk matrixes. The experiments were performed in triplicate and the results are expressed as percent (%) comparing to the internal standard in distilled water (n=3). FM-1, FM-2, FM-3, FM-4 and FM-5 are the fermented milk after 1, 2, 3, 4 and 5 days of fermentation, respectively.

**Table S1.** List of amino acid modifications (PTMs) of bovine  $\kappa$ -CN according to the online database UniProtKB (Last access on 24.05.2022)

**Table S2.** List of peptides obtained after the in-silico tryptic digestion of  $\kappa$ -CN using the PeptideCutter tool of UniprotKB. The information on the sequence of the primary chains was collected from the online database UniProtKB (Accession number: P02668|CASK\_BOVIN). Red and green colors represent glycosylated and phosphorylated amino acid residues, respectively.

**Table S3.** List of peptides obtained after the in-silico GluC-E digestion (Ambi buffer) of k-casein. The information on the sequence of the primary chains was collected from the online database UniProtKB (Accession number: P02668|CASK\_BOVIN). Red and green colors represent glycosylated and phosphorylated amino acid residues, respectively

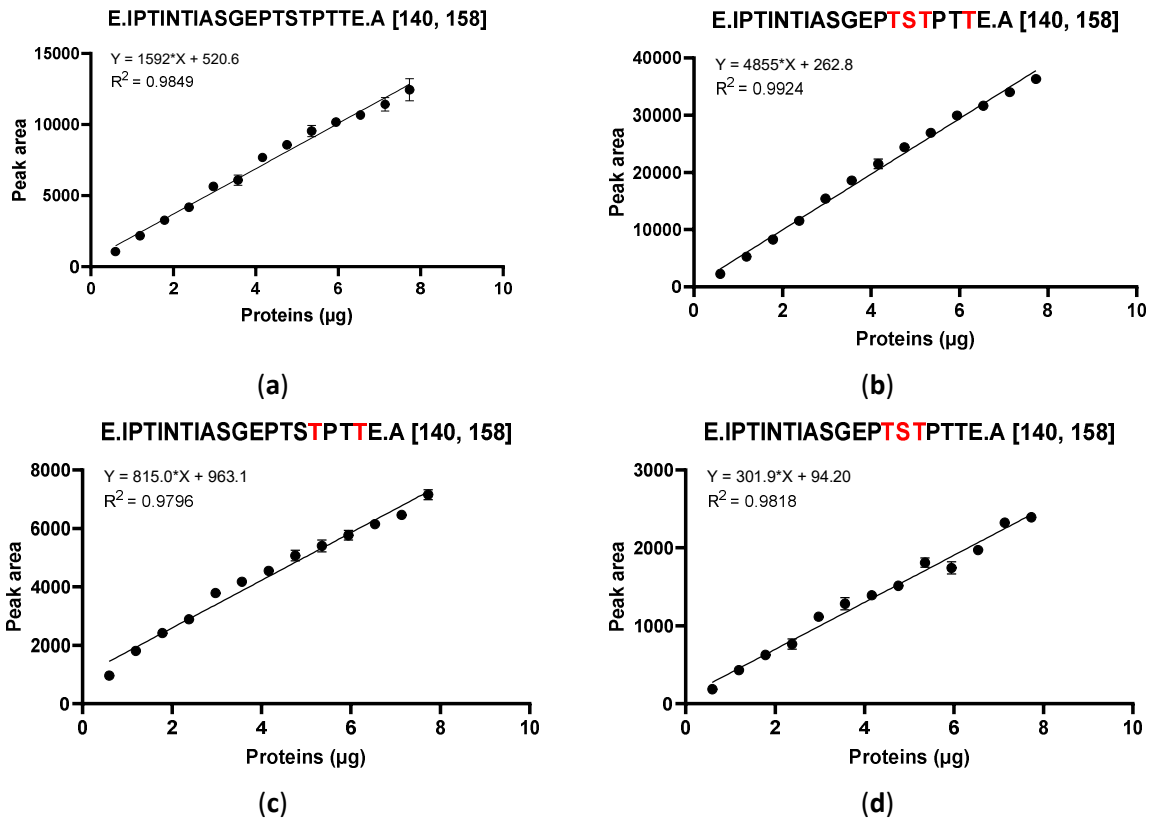

**Figure S1.** Linearity of the peptide (a) E.IPTINTIASGEPTSTPTTE.A [140, 158] and it modified forms (b) IPTINTIASGEPTSTPTTE [140, 158], (c) IPTINTIASGEPTSTPTTE [140, 158] and (d) IPTINTIASGEPTSTPTTE [140, 158] using the developed LC-MS/MS method. Modified serine and threonine residues are underlined. Red and blue colors indicate glycosylation and phosphorylation modifications, respectively.

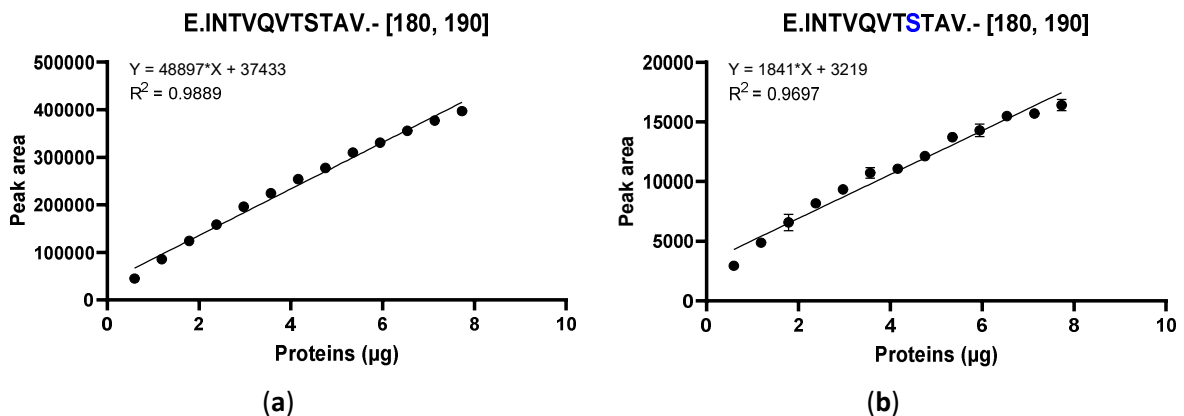

**Figure S2.** Linearity of the peptide (a) E.INTVQVTSTAV [180, 190] and it modified form (b) INTVQVTSTAV [180, 190] using the developed LC-MS/MS method. Modified serine and threonine residues are underlined. Red and blue colors indicate glycosylation and phosphorylation modifications, respectively.

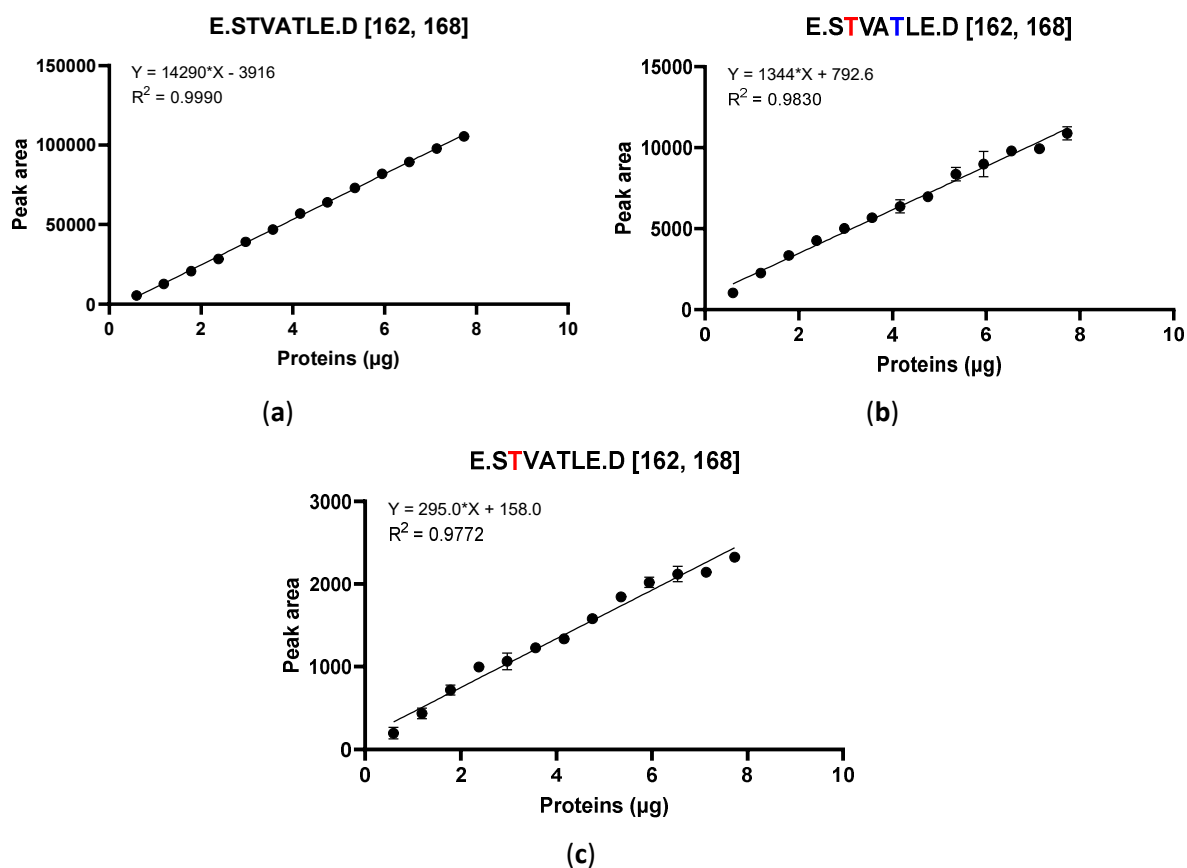

**Figure S3.** Linearity of the peptide (a) E.STVATLE.D [162, 168] and its modified forms (b) STVATLE [162, 168] and (c) STVATLE [162, 168] using the developed LC-MS/MS method. Modified serine and threonine residues are underlined. Red and blue colors indicate glycosylation and phosphorylation modifications, respectively.

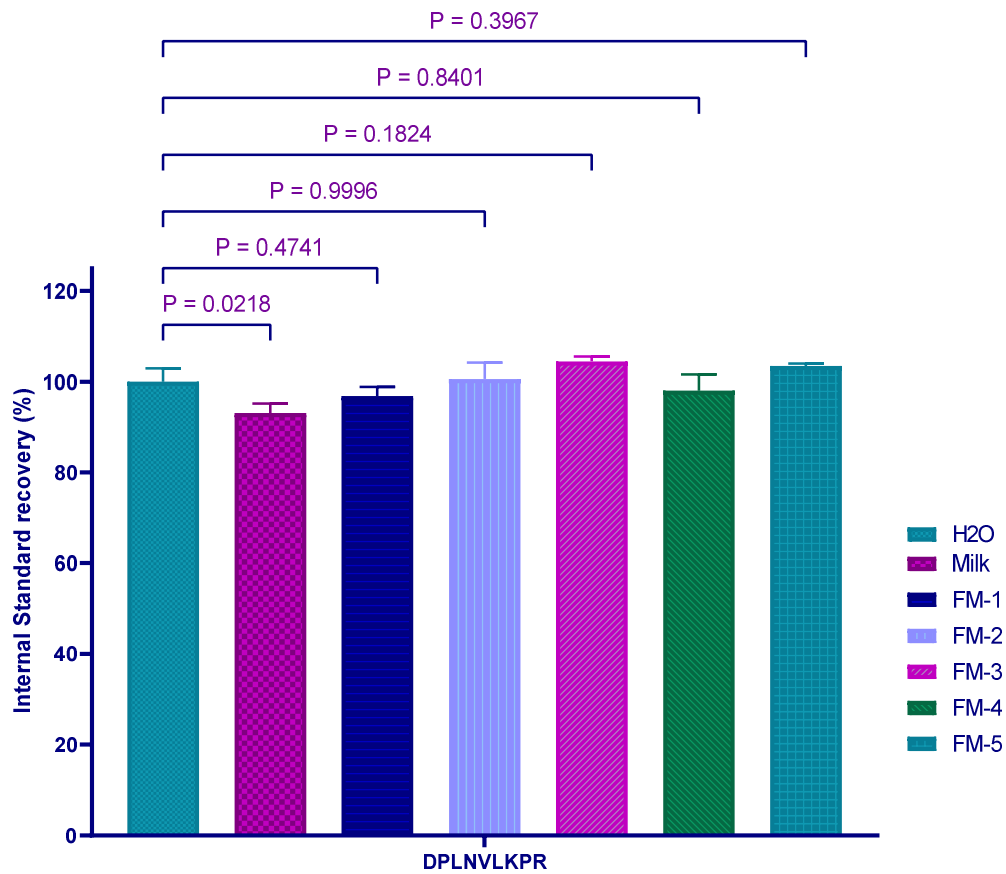

**Figure S4.** Recovery of the injected internal standards DPLNV(d8)LKPR in the different milk and fermented milk matrixes. The experiments were performed in triplicate and the results are expressed as percent (%) comparing to the internal standard in distilled water (n=3). FM-1, FM-2, FM-3, FM-4 and FM-5 are the fermented milk after 1, 2, 3, 4 and 5 days of fermentation, respectively.

**Table S1.** List of amino acid modifications (PTMs) of bovine  $\kappa$ -CN according to the online database UniProtKB (Last access on 24.05.2022)

| Feature key      | Position(s) | Description Actions                                               |
|------------------|-------------|-------------------------------------------------------------------|
| Modified residue | 22          | Pyrrolidone carboxylic acid <sup>1</sup> Publication              |
| Disulfide bond   | 32 ↔ 109    |                                                                   |
| Disulfide bond   | 32          | Interchain (with C-109); in linked form                           |
| Disulfide bond   | 109         | Interchain (with C-32); in linked form                            |
| Glycosylation    | 142         | O-linked (GalNAc...) threonine <sup>3</sup> Publications          |
| Modified residue | 148         | Phosphoserine <sup>1</sup> Publication                            |
| Glycosylation    | 152         | O-linked (GalNAc...) threonine <sup>3</sup> Publications          |
| Glycosylation    | 153         | O-linked (GalNAc...) serine <sup>1</sup> Publication              |
| Glycosylation    | 154         | O-linked (GalNAc...) threonine <sup>3</sup> Publications          |
| Glycosylation    | 157         | O-linked (GalNAc...) threonine <sup>3</sup> Publications          |
| Glycosylation    | 163         | O-linked (GalNAc...) threonine <sup>3</sup> Publications          |
| Modified residue | 166         | Phosphothreonine <sup>1</sup> Publication                         |
| Modified residue | 170         | Phosphoserine; alternate <sup>2</sup> Publications                |
| Glycosylation    | 170         | O-linked (GalNAc...) serine; alternate <sup>1</sup> Publication   |
| Glycosylation    | 186         | O-linked (GalNAc...) threonine; partial <sup>3</sup> Publications |
| Modified residue | 187         | Phosphoserine by similarity                                       |

**Table S2.** List of peptides obtained after the in-silico tryptic digestion of  $\kappa$ -CN using the PeptideCutter tool of UniprotKB. The information on the sequence of the primary chains was collected from the online database UniProtKB (Accession number: P02668|CASK\_BOVIN). Red and green colors represent glycosylated and phosphorylated amino acid residues, respectively.

| No | Position of cleavage site | Resulting peptide sequence                            | Peptide length [aa] | Peptide mass [units] |
|----|---------------------------|-------------------------------------------------------|---------------------|----------------------|
| 1  | 3                         | MMK                                                   | 3                   | 408.6                |
| 2  | 31                        | SFFLVVTILALTLPFLGAQEQNQEQPIR                          | 28                  | 3173.7               |
| 3  | 34                        | CEK                                                   | 3                   | 378.4                |
| 4  | 37                        | DER                                                   | 3                   | 418.4                |
| 5  | 42                        | FFSDK                                                 | 5                   | 642.7                |
| 6  | 45                        | IAK                                                   | 3                   | 330.4                |
| 7  | 55                        | YIPIQYVLSR                                            | 10                  | 1251.5               |
| 8  | 89                        | YPSYGLNYYQQKPVALINNQLPYPYAKPAAVR                      | 34                  | 4011.6               |
| 9  | 107                       | SPAQILQWQVLSNTVPAK                                    | 18                  | 1980.3               |
| 10 | 118                       | SCQAQPTTMAR                                           | 11                  | 1193.4               |
| 11 | 132                       | HPHPLSFMAIPPK                                         | 14                  | 1608.9               |
| 12 | 133                       | K                                                     | 1                   | 146.2                |
| 13 | 137                       | NQDK                                                  | 4                   | 503.5                |
| 14 | -                         | TEIPTINTIASGEPTSTPTTEAVESTVATLEDSPEVIESPPEINTVQVTSTAV | 53                  | 5455.9               |

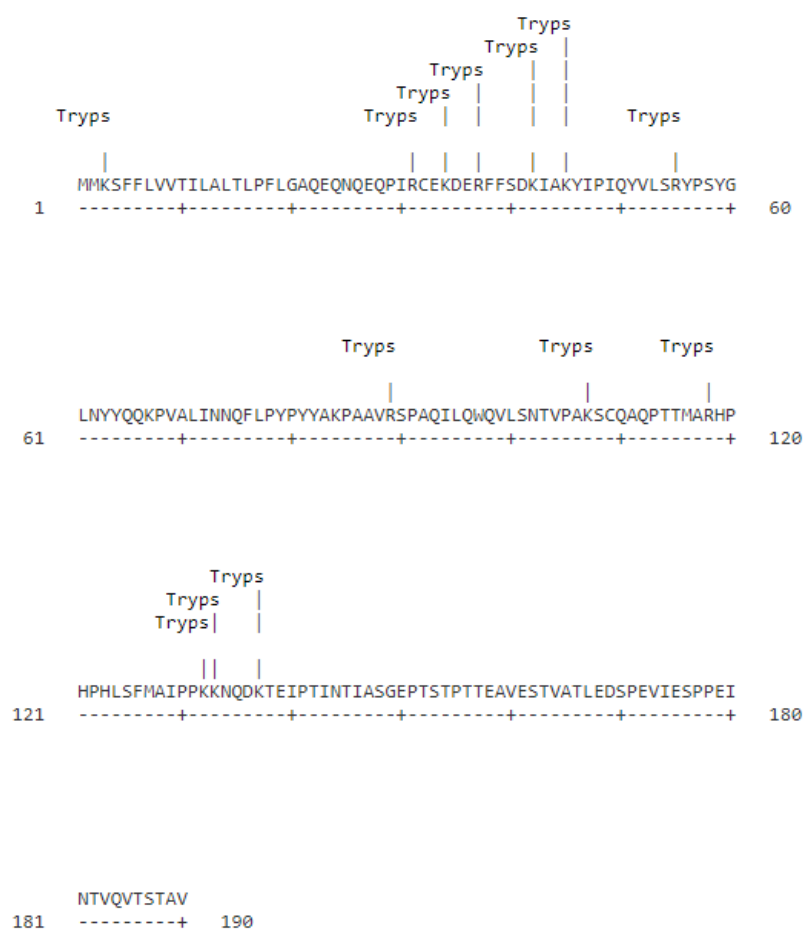

Supplement: s1 [file s1]
